# Supplementary material
Source: publisher figshare collection journal article supplement (https://acs.figshare.com/ndownloader/files/9547135)
Supplement: Supplementary file 1 [file 9547135]

## **Supplementary Information for**

### **Selective and Sensitive Detection of Methylcytosine by Aerolysin**

#### **Nanopore under Serum Condition**

Jie Yu, Chan Cao and Yi-Tao Long\*

Key Laboratory for Advanced Materials & School of Chemistry and Molecular  
Engineering, East China University of Science and Technology,  
Shanghai, 200237, P.R. China.

\*E-mail: ytlong@ecust.edu.cn

#### **Table of contents**

##### **Figure S1**

Dwell time of DNA oligomers traversing aerolysin nanopore

##### **Figure S2**

Histograms of the residual current blockade for DNA oligomers

##### **Figure S3**

Residual current blockade for methylated and unmethylated DNA

##### **Table S1**

Mean values of event frequency for DNA oligomers at different applied potentials

##### **Table S2**

Comparison of mean event frequency of DNA oligomers with different concentration ratios

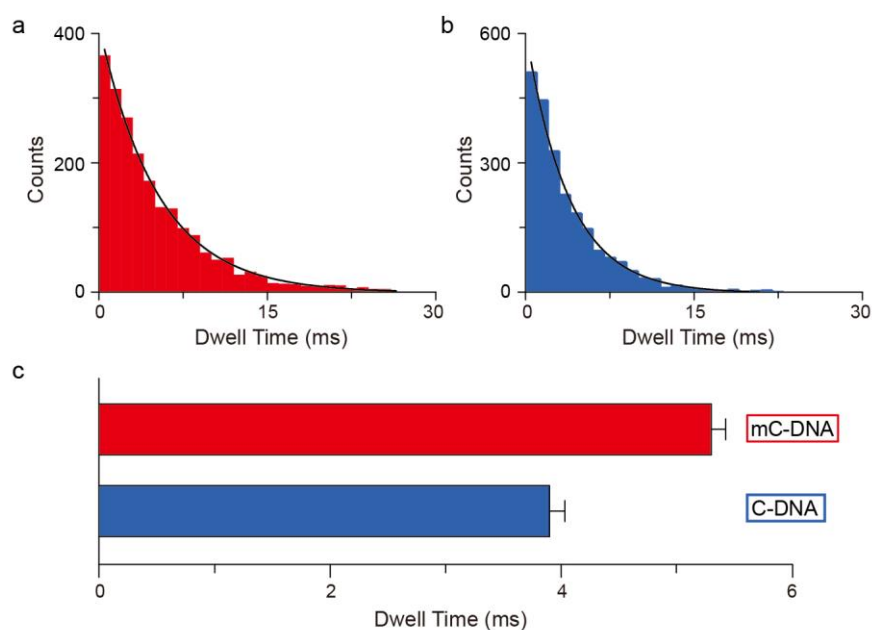

**Figure S1.** Dwell time of DNA oligomers traversing aerolysin nanopore. The dwell time histograms of (a) mC-DNA and (b) C-DNA were all fitted to single exponential function. (c) Mean values of dwell time of mC-DNA and C-DNA. The values were  $5.3 \pm 0.1$  and  $3.9 \pm 0.1$  ms, respectively. Data were based on at least three separate experiments and were recorded in 1 M KCl, 10 mM Tris, 1 mM EDTA, pH 8.0 at +80 mV.

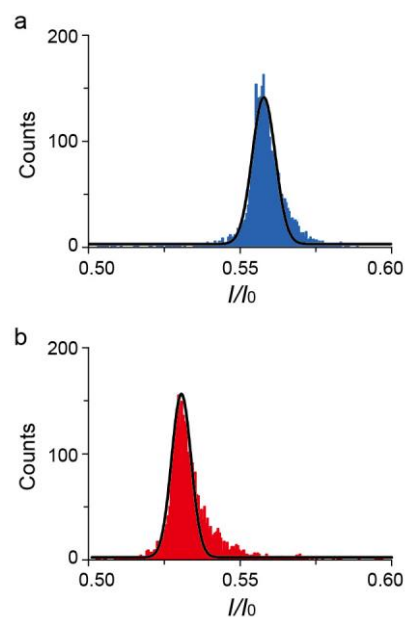

**Figure S2.** Histograms of the residual current blockade for (a) C-DNA and (b) mC-DNA. Values were obtained by fitting the current distribution with the Gaussian function. C-DNA and mC-DNA generated a current blockade of  $I/I_0 = 0.56$  and  $I/I_0 = 0.53$ , respectively. Data were recorded in 1 M KCl, 10 mM Tris, 1 mM EDTA, pH 8.0 at +80 mV.

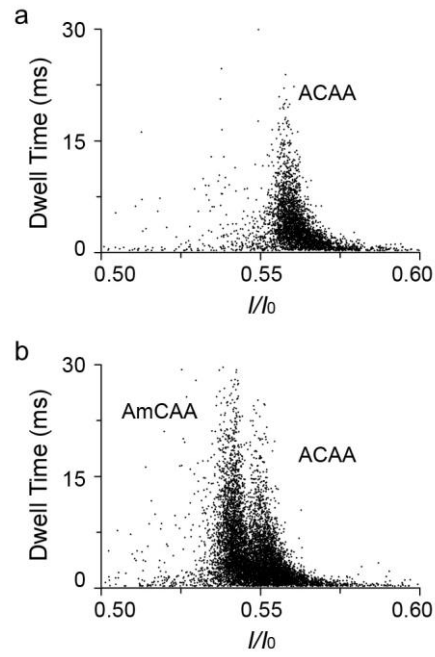

**Figure S3.** Scatter plots induced by the addition of DNA oligomers. ACAA and AmCAA were added into *cis* chamber in succession. Distributions for the addition of (a) ACAA, (b) ACAA and AmCAA were shown. Statistical results shown that ACAA could be distinguished from AmCAA. Data were recorded in 1 M KCl, 10 mM Tris, 1 mM EDTA, pH 8.0 at +80 mV.

**Table S1.** Mean values of event frequency for DNA oligomers at different applied potentials. Values were obtained from the slopes that linear fitted to number-versus-time curves. Data were recorded for 5 min using a single aerolysin nanopore. Experiments were performed in triplicate and the standard deviation were shown.

| <b>Potential (mV)</b> | <b>Event Frequency (s<sup>-1</sup>)</b> |              |
|-----------------------|-----------------------------------------|--------------|
|                       | <b>mC-DNA</b>                           | <b>C-DNA</b> |
| 60                    | 2.39 ± 0.04                             | 1.74 ± 0.06  |
| 80                    | 7.10 ± 0.02                             | 5.93 ± 0.05  |
| 100                   | 17.72 ± 0.20                            | 14.76 ± 0.06 |
| 120                   | 30.17 ± 0.06                            | 28.24 ± 0.07 |
| 140                   | 42.11 ± 0.21                            | 40.77 ± 0.12 |

**Table S2.** Comparison of mean event frequency of DNA oligomers with different concentration ratios. Values were obtained from the slopes that linear fitted to number-versus-time curves. Data were recorded for 5 min using a single aerolysin nanopore. Experiments were performed in triplicate and the standard deviation were shown.

| Ratio<br>(mC-DNA : C-DNA) | Event Frequency (s <sup>-1</sup> ) |              |
|---------------------------|------------------------------------|--------------|
|                           | mC-DNA                             | C-DNA        |
| 0 : 1                     | 0                                  | 5.93 ± 0.05  |
| 1 : 0                     | 7.10 ± 0.02                        | 0            |
| 1 : 1                     | 6.63 ± 0.05                        | 4.98 ± 0.08  |
| 2 : 1                     | 12.23 ± 0.13                       | 4.98 ± 0.03  |
| 3 : 1                     | 16.99 ± 0.07                       | 6.46 ± 0.08  |
| 3 : 2                     | 20.00 ± 0.07                       | 10.70 ± 0.05 |
